# Supplementary material
Source: PubMed Central journal article supplement (PMC6851449)
Supplement: NIHMS1520855-supplement-Supplement.pdf [file NIHMS1520855-supplement-Supplement.pdf]

## **SUPPLEMENTAL MATERIAL**

### **APPENDIX**

Working Group Members:

Writing Group:

Anne R. Cappola, MD, ScM, Perelman School of Medicine at the University of Pennsylvania; Akshay S. Desai, MD, MPH, Brigham and Women's Hospital; Marco Medici, MD, PhD, MSc, Erasmus University Medical Center; Lawton Cooper, MD, MPH, National Heart, Lung, and Blood Institute; Debra Egan, MPH, National Center for Complementary and Integrative Health; George Sopko, MD, MPH, National Heart, Lung, and Blood Institute; Glenn I. Fishman, MD, NYU School of Medicine; Steven Goldman, MD, University of Arizona; David S. Cooper, MD, Johns Hopkins University School of Medicine; Samia Mora, MD, MHS; Brigham and Women's Hospital; Peter J. Kudenchuk, MD, University of Washington; Anthony N. Hollenberg, MD, Weill Cornell Medicine; Cheryl L. McDonald, MD, National Heart, Lung, and Blood Institute; Paul W. Ladenson, MD, Johns Hopkins University School of Medicine

Members:

Francesco S. Celi, MD, MHSc, Virginia Commonwealth University; Wolfgang Dillman, MD, University of California San Diego; Christina Ellervik, MD, PhD, DMSci, Boston Children's Hospital; A. Martin Gerdes, PhD, New York Institute of Technology College of Osteopathic Medicine; Carolyn Ho, MD, Brigham and Women's Hospital; Giorgio Iervasi, MD, Italian National Research Council; Amir Lerman, MD, Mayo Clinic; Ayako Makino, PhD, University of Arizona; Kaie Ojamaa, PhD, New York Institute of Technology College of Osteopathic Medicine; Robin Peeters, MD, PhD, Erasmus University Medical Center; Alessandro Pingitore, MD, PhD, Italian National Research Council; Salman Razvi, MD, Newcastle University; Ari J. Wassner, MD, Boston Children's Hospital
